# Supplementary material for: Cross-Site Concordance Evaluation of Tumor DNA and RNA Sequencing Platforms for the CIMAC-CIDC Network
Source: Oxford University Press journal article supplement (doi:10.1158/1078-0432.ccr-20-3251), 2020-12-15
Supplement: 10780432ccr203251-sup-249672_2_supp_6744221_qk9zqx.xlsx [file 10780432ccr203251-sup-249672_2_supp_6744221_qk9zqx.xlsx]

## Sheet: Sup.Table.S1
Sup.Table.S1: DNA Quantity and individual cell lines of HapMap samples prepared by center C.
HapMap DNA quantities
Item No	Sample ID	DNA amount
1	HapMap xx	500ng
2	HapMap xx	500ng
3	HapMap yy	500ng
4	HapMap yy	500ng
5	GM07014, one of the HapMap lines from xx pool	1ug
6	GM12386, one of the HapMap lines from YY pool	1ug
Individual HapMap cell lines used to generate admixture of Pool xx and Pool yy ( Cell lines with red fonts were used as germline control for mutation) call).
xx	yy
GM10840	GM12767
GM18595	GM18618
GM18957	GM19059
GM18488	GM19147
GM18511	GM19179
GM18867	GM19190
GM18924	GM19214
GM19108	GM19235
GM19114	GM19247
GM07014	GM12386

## Sheet: Sup.Table.S2
Sup.Table.S2: WES DNA preparation and QC metrics of FFPE, FF, and PBMC samples from eight lung cancer cases. All DNA samples were quality controlled on 1 % agarose gel and 55 μL aliquots were prepared. For the cancer samples, one sample pair failed due to germline and tumor sample mismatch.
Patient Sample ID	Tissue Type	Tumor	Processing	DNA Conc (ng/ul, nanodrop)	DNA Conc (ng/ul, Qubit)	Total amount (µg, Qubit)	260/280	260/230
Pt.2	Frozen	0.44	Regular cut	958.1	698	38.4	1.89	2.34
Pt.2	FFPE	0.38	Regular cut	146.9	88.8	4.9	1.82	2.05
Pt.2	PBMC			61.3	61.3	3.4	1.86	2.07
Pt.3	Frozen	0.56	Regular cut	1085.2	724	39.8	1.88	2.31
Pt.3	FFPE	0.4	Regular cut	531.5	288	15.8	1.89	2.24
Pt.3	PBMC			154.3	154.3	8.5	1.88	2.01
Pt.7	Frozen	0.49	Regular cut	820.4	538	29.6	1.86	2.32
Pt.7	FFPE	0.46	Regular cut	413.6	252	13.9	1.9	2.24
Pt.7	PBMC			201.2	201.2	11.1	1.89	2.02
Pt.8	Frozen	0.7	Macro-dissection	870.4	598	32.9	1.86	2.25
Pt.8	FFPE	0.41	Regular cut	249	118	6.5	1.87	2.198
Pt.8	PBMC			541.9	541.9	29.8	1.87	2.25
Pt.9	Frozen	0.8	Macro-dissection	941.8	726	39.9	1.88	2.3
Pt.9	FFPE	0.79	Regular cut	934.8	366	20.1	1.86	2.37
Pt.9	PBMC			386.2	358	19.7	1.9	2.33
Pt.11	Frozen	0.7	Macro-dissection	1135.1	860	47.3	1.89	2.34
Pt.11	FFPE	0.45	Regular cut	339	150	8.3	1.86	2.05
Pt.11	PBMC			186.5	186.5	10.3	1.89	2.26
Pt.13	Frozen	0.8	Macro-dissection	774.8	730	40.2	1.89	2.29
Pt.13	FFPE	0.38	Regular cut	387.1	186	10.2	1.86	2.03
Pt.13	PBMC			478.2	406	22.3	1.88	2.28
Pt.14	Frozen	0.5	Macro-dissection	904.7	606	33.3	1.87	2.27
Pt.14	FFPE	1	Regular cut	1305.8	414	22.8	1.87	2.27
Pt.14	PBMC			1124.6	836	46	1.86	2.32

## Sheet: Sup.Table.S3
Sup.Table.S3. RNA quantity and quality metrics of FFPE and FF samples from 8 NSCLC cases centrally extracted at Center B and distributed to all centers. RNA samples were assessed on Qubit to determine QC for run1. FFPE samples in run 1 and run 2 were also assessed on Qubit and tape-station for DV200 values before distribution to each center. N/A: Not determined before sample distribution.
RNA quantity and quality metrics of FFPE and FF samples evaluated by Center B
Sample ID	Tissue type	Tumor	Extraction sample	RIN	260/280	260/230	DV 200
Pt.2	FF Run #1	76	Regular Cut	8.4	2.07	2.11	N/A
	FFPE Run #1	50	Regular Cut	2.7	1.92	1.81	N/A
	FFPE Run #2	38	Regular Cut	2.5	1.9	2	43.78
Pt.3	FF Run #1	80	Regular Cut	3.7	2.07	2.05	N/A
	FFPE Run #1	40	Regular Cut	2.4	2.03	2.07	N/A
	FFPE Run #2	40	Regular Cut	1.7	2.03	2	63.25
Pt.7	FF Run #1	50	Regular Cut	6.1	2.09	2.07	N/A
	FFPE Run #1	40	Regular Cut	2.4	2.05	2.14	N/A
	FFPE Run #2	46	Regular Cut	1.7	1.98	2.2	52.72
Pt.8	FF Run #1	70	Macrodissection	7.7	2.09	2.14	N/A
	FFPE Run #1	30	Regular Cut	2.6	2.02	2.15	N/A
	FFPE Run #2	40.7	Regular Cut	1.7	2.04	2.17	47.49
Pt.9	FF Run #1	80	Macrodissection	7.2	2.1	1.84	N/A
	FFPE Run #1	80	Regular Cut	2.1	2.01	2.13	N/A
	FFPE Run #2	79	Regular Cut	1.5	2.03	2.19	51.11
Pt.11	FF Run #1	70	Macrodissection	7.2	2.07	2.12	N/A
	FFPE Run #1	40	Regular Cut	2.1	2.01	2.11	N/A
	FFPE Run #2	45	Regular Cut	2.4	1.98	1.91	54.04
Pt.13	FF Run #1	80	Macrodissection	6	2.09	1.98	N/A
	FFPE Run #1	38	Regular Cut	2.1	2.02	2.16	N/A
	FFPE Run #2	38	Regular Cut	2	2.02	2.14	51.69
Pt.14	FF Run #1	50	Macrodissection	8.5	2.11	2.11	N/A
	FFPE Run #1	almost 100	Regular Cut	2.1	2.03	2.14	N/A
	FFPE Run #2	almost 100	Regular Cut	1.9	2.08	2.16	58.3
Internal RNA quantity metrics of the FFPE and FF sites at each center.
		Center A			Center B			Center C
Sample ID	Material type	RIN	DV200 (%)	Conc (ng/uL)	RIN	DV200 (%)	Conc (ng/uL)	RIN	DV200 (%)	Conc (ng/uL)
Pt.2	FF-1	6	83	17.74	6.3	84	5.5	5.8	82	16
Pt.2	FF-2	6.2	83	18.08	6.3	84	5.2	5.9	82	16
Pt.2	FFPE-1	2.5	20	21.01	1.3	20	4.6	1.4	28	18
Pt.2	FFPE-2	2.6	23	22.06	1.3	23	5.8	1.5	29	18.6
Pt.2	FFPE-1	1.7	46	36.3	1.1	43	N/A	1.5	53	140
Pt.2	FFPE-2	1.7	49	34.3	1.1	47	N/A	1.6	56	130
Pt.3	FF-1	5.1	74	21.08	6.2	72	6.8	5.7	72	16
Pt.3	FF-2	5.2	72	20.07	6.4	71	7.3	5.6	72	16
Pt.3	FFPE-1	2.5	8	21.71	1.8	11	6.4	1.7	17	16
Pt.3	FFPE-2	2.9	6	24.69	2	11	4.9	1.7	17	16
Pt.3	FFPE-1	1.5	42	30.4	1.2	50	N/A	1.7	58	122
Pt.3	FFPE-2	1.5	43	29.7	1.2	51	N/A	1.7	59	119
Pt.7	FF-1	5.8	82	19.7	6.5	88	6	5.9	84	18.9
Pt.7	FF-2	6	84	14.92	6.5	88	8.5	6	83	18
Pt.7	FFPE-1	2.5	17	19.69	1.4	25	4.1	1.3	29	15
Pt.7	FFPE-2	2.5	19	3	1.4	25	4.1	1.4	32	17
Pt.7	FFPE-1	2.4	41	25.5	1.8	54	N/A	2.3	62	104
Pt.7	FFPE-2	2.4	52	11.9	1.8	57	N/A	2.3	62	105
Pt.8	FF-1	5.8	80	3.15	6	84	6.3	5.1	82	15
Pt.8	FF-2	5.9	82	3.92	6.2	84	7.8	5	82	15
Pt.8	FFPE-1	2.6	42	17.08	1.3	45	5.7	1.2	50	14
Pt.8	FFPE-2	2.5	41	3.85	1.2	42	6.3	1.2	50	14
Pt.8	FFPE-1	2	46	34.9	1.3	46	N/A	1.8	58	148
Pt.8	FFPE-2	2	45	35.9	1.3	47	N/A	1.6	55	138
Pt.9	FF-1	7	84	14.41	7.4	90	6.7	6.7	86	15
Pt.9	FF-2	7	84	13.94	7.4	89	6.68	6.4	86	12
Pt.9	FFPE-1	2.6	10	21.81	1.6	14	4.63	1.8	19	15
Pt.9	FFPE-2	2.5	11	20.48	1.9	14	4.96	1.6	17	15
Pt.9	FFPE-1	1.9	53	28.8	1.5	55	N/A	1.8	63	115
Pt.9	FFPE-2	1.9	52	27.1	1.5	55	N/A	1.9	61	113
Pt.11	FF-1	7.6	86	16.3	8.3	88	5.7	7.5	84	14.5
Pt.11	FF-2	6.9	86	17.08	8.2	87	7.1	7.7	83	14
Pt.11	FFPE-1	3.3	56	17.43	2.1	63	5.3	2.1	62	14.5
Pt.11	FFPE-2	3.3	53	18.72	2.3	54	4.3	2.1	63	16
Pt.11	FFPE-1	2.5	47	31	2.1	49	N/A	2.3	54	61.7
Pt.11	FFPE-2	2.5	47	31.4	1.9	53	N/A	2.4	54	65
Pt.13	FF-1	4.3	74	17.16	1	72	7.4	3.5	74	15
Pt.13	FF-2	3.9	75	16.57	1	72	6.9	3.3	75	15
Pt.13	FFPE-1	2.6	26	20.39	1.1	31	3.7	1.2	39	17
Pt.13	FFPE-2	2.7	27	20.19	1	30	7.2	1.3	40	15.7
Pt.13	FFPE-1	1.7	53	31.4	1.3	59	N/A	1.7	64	123
Pt.13	FFPE-2	1.7	55	32.1	1.4	62	N/A	1.8	67	115
Pt.14	FF-1	5.4	75	17.46	5.1	80	6.8	4.6	80	16
Pt.14	FF-2	5.5	77	15.1	5.2	82	5	4.5	80	15
Pt.14	FFPE-1	2.5	5	3.21	1.9	11	6.9	1.8	16	16
Pt.14	FFPE-2	2.4	5	22.31	1.6	10	5.5	1.8	16	16
Pt.14	FFPE-1	1.3	43	30	1.1	48	N/A	1.6	59	131
Pt.14	FFPE-2	1.3	44	32.1	1.1	51	N/A	1.5	56	122

## Sheet: Sup.Table.S4
Sup.Table.S4. WES mean target coverage (MTC) and % target base metrics at Center A, B, and C. F = Fresh frozen, FP = Formalin-fixed paraffin-embedded, N = Normal
	Center A			Center B			Center C
SAMPLE	MTC	% target base 20X	% target base 50X	MTC	% target base 20X	% target base 50X	MTC	% target base 20X	% target base 50X
Hapmap-xx-01	331.43	0.97	0.96	N.A.	N.A.	N.A.	378.49	94.87	63.33
Hapmap-xx-02	286.16	0.97	0.96	N.A.	N.A.	N.A.	302.76	93.61	61.19
Hapmap-yy-01	460.57	0.97	0.96	N.A.	N.A.	N.A.	348.47	94.55	60.58
Hapmap-yy-02	413.65	0.97	0.96	N.A.	N.A.	N.A.	311.35	93.75	62.71
R1-1-F	385.94	0.97	0.96	496	>0.90	>0.95	295.33	92.59	83.32
R1-1-FP	81.95	0.87	0.63	394	>0.85	>0.85	297.08	92.17	82.7
R1-1-N	372.1	0.97	0.96	>250	>0.95	>0.95	198.98	N.A.	72.88
R1-2-F	382.36	0.97	0.96	620	>0.90	>0.95	309.7	92.85	77.32
R1-2-FP	321.52	0.96	0.94	359	>0.85	>0.85	310.52	92.3	79.53
R1-2-N	470.85	0.97	0.96	>250	>0.95	>0.95	173.03	N.A.	66.12
R1-3-F	436.85	0.97	0.96	610	>0.90	>0.95	315.94	92.73	82.21
R1-3-FP	129.35	0.93	0.8	267	>0.85	>0.85	253.43	90.34	79.92
R1-3-N	365.2	0.97	0.96	>250	>0.95	>0.95	190.06	N.A.	68.24
R1-4-F	391.32	0.97	0.96	562	>0.90	>0.95	314.07	92.85	84.18
R1-4-FP	141.7	0.93	0.81	326	>0.85	>0.85	295.55	91.92	80.91
R1-4-N	368.35	0.97	0.96	>250	>0.95	>0.95	177.57	N.A.	68.64
R1-5-F	420.48	0.97	0.96	523	>0.90	>0.95	341.72	93.52	83.25
R1-5-FP	114	0.92	0.76	320	>0.85	>0.85	319.48	92.77	80.84
R1-5-N	349.92	0.97	0.96	>250	>0.95	>0.95	184.93	N.A.	68.66
R1-6-F	396.19	0.97	0.95	551	>0.90	>0.95	294.97	92.31	80.89
R1-6-FP	192.47	0.94	0.85	335	>0.85	>0.85	244.54	90.1	79.33
R1-6-N	306.73	0.97	0.96	>250	>0.95	>0.95	177.66	N.A.	68.53
R1-8-F	370.51	0.97	0.96	518	>0.90	>0.95	317.53	93.11	82.34
R1-8-FP	266.98	0.96	0.92	269	>0.85	>0.85	279.25	91.58	80.86
R1-8-N	354.55	0.97	0.96	>250	>0.95	>0.95	170.55	N.A.	67.78
R2-1-F	488.95	0.97	0.96	529	>0.90	>0.95	313.16	92.9	81.66
R2-1-FP	293.03	0.96	0.92	274	>0.85	>0.85	274.81	91.29	80.58
R2-1-N	486.26	0.97	0.96	>250	>0.95	>0.95	170.27	N.A.	64.43
R2-2-F	471.63	0.97	0.96	525	>0.90	>0.95	344.08	93.63	86.2
R2-2-FP	190.47	0.95	0.87	397	>0.85	>0.85	293.14	92.11	81.61
R2-2-N	400.01	0.97	0.96	>250	>0.95	>0.95	185.89	N.A.	66.67
R2-3-F	455.39	0.97	0.96	571	>0.90	>0.95	292.203	92.6293	77.9986
R2-3-FP	99.38	0.88	0.66	368	>0.85	>0.85	268.213	91.2892	79.1381
R2-3-N	427.94	0.97	0.96	>250	>0.95	>0.95	189.602	N.A.	57.0366
R2-4-F	484.32	0.97	0.96	536	>0.90	>0.95	301.493	92.3892	81.7977
R2-4-FP	279.82	0.95	0.9	313	>0.85	>0.85	252.783	90.4891	77.0779
R2-4-N	412.29	0.97	0.96	>250	>0.95	>0.95	203.802	N.A.	68.9457
R2-5-F	479.45	0.97	0.96	614	>0.90	>0.95	317.413	92.9592	79.7781
R2-5-FP	258.17	0.95	0.89	342	>0.85	>0.85	267.913	91.289	75.3677
R2-5-N	373.94	0.97	0.96	>250	>0.95	>0.95	186.102	N.A.	67.7268
R2-6-F	491.16	0.97	0.96	459	>0.90	>0.95	338.983	93.5192	83.1379
R2-6-FP	493.58	0.97	0.95	295	>0.85	>0.85	332.353	93.1191	76.7275
R2-6-N	492.97	0.97	0.96	>250	>0.95	>0.95	166.282	N.A.	62.5367
R2-7-F	427.95	0.97	0.96	605	>0.90	>0.95	291.003	92.2993	80.8883
R2-7-FP	431.26	0.97	0.95	329	>0.85	>0.85	245.833	90.0693	81.1376
R2-7-N	451.93	0.97	0.96	>250	>0.95	>0.95	203.312	N.A.	71.8062

## Sheet: Sup.Table.S5
Sup.Table.S5. Pre-analytical QC metrics, center-specific acceptance criteria, and post-assay QC metrics for each sequencing center.
Pre-analytical RNA quality – Center-specific criteria for all sample types (FF + FFPE). These criteria were followed by all the centers to perform sequencing on the samples
Sequencing center	RNA QC metric	Minimum required	Method/instrument
Center A	RNA amount	 250 ng (500ng ideal)	RiboGreen/Varioscan
	RNA quality	RQS (Caliper) > 5.5	Caliper Instrument
		For FFPE: DV200 > 30 % for higher quality; but all FFPE samples are considered low quality for RNA
Center B	RNA amount	> 200 ng	Ribogreen
	RNA quality	1.8 - 2.0 ratio	A260/280
		 1.8 ratio	A260/230
		DV200 > 50 %	DV200/TapeStation 4200
Center C	RNA amount	 200 ng	QuantIt BR/Fluorometer
	RNA quality	DV200  30 %	DV200/TapeStation
Intra-assay QC metrics – Center-specific acceptance criteria for all sample types.
Sequencing center	RNA-seq library QC metric	Expected	Minimum required for pass	Method/instrument - Notes
Center A	Final Library concentration	 5 ng/ul		PicoGreen; Flagged samples still processed.
Center B	Target mean length	325 bp	a peak positioned between 200 to 500 bp	Agilent TapeStation 4200
	Final library concentration	> 5 nM of the final library,		Kappa quantitation kit
		CT value > 2 nM via qPCR
Center C	Pre-hybridization library size	260 bp	 200 bp, ≤ 300 bp	TapeStation (D1000 tape)
	Pre-hybridization library quantity	 200 ng	 150 ng	TapeStation (D1000 tape)
	Final library Size	 350 bp	 250 bp	TapeStation (D1000 tape)
	Final library concentration	 2 mM	 1.5 mM	TapeStation (D1000 tape)
Current sequencing QC metrics criteria at each center
Sequencing center	Sequencing QC metric	Expected	Minimum required for pass
Center A	Insert Size	280 – 320 range
	Duplication rate	50 – 65 %
	3’, 5’ Bias (0-1)	< 0.5 (typically ≤ 0.3 for high quality – not degraded RNA)
	% mRNA Bases	> 60 %
	% rRNA Bases	< 5 %
	Target Depth		50 M fragments in pairs, 100 M reads
Center B	% mRNA Bases	> 70 %
	% aligned	> 90 %
	Target Depth	100 M of paired reads
Center C	% stranded	> 95 %
	% mRNA Bases	> 70 %
	% aligned	> 90 %
	Target Depth	50 M fragments in pairs, 100 M reads (2x150 bp)	> 30 M reads
Post-Assay QC metrics – Overview of center-specific post-assay QC criteria
Sequencing center	Post-sequencing QC method	Minimum expected /required for pass
Center A	1) RSeQC (Wang et al., Bioinfo 2012) for quality control of the RNA-seq samples, which includes but is not limited to: gene coverage evenness, RNA fragment size, and junction annotation.
	2) Based on the sample correlation distribution between The Cancer Genome Atlas (TCGA) non-small cell lung cancer (NSCLC) samples, a Spearman correlation coefficient > 90 % (ideally > 95 %) is used to evaluate agreement between two fresh frozen samples (replicates or between sites) from the same tumor.
	3) The median transcript integrity number (medTIN> 70) is often a measure of RNA degradation.
	4) The medTIN of FFPE samples and the correlations between FFPE replicates are expected to be lower.
Center B	Calculation of read distribution to exonic, intronic, and intergenic regions.	Runs with exonic rate > 70 % are acceptable for downstream analysis.
Center C	Any sample that did not generate 30 M reads is considered failed and requeued for sequencing.

## Sheet: Sup.Table.S6
Sup.Table.S6. Samples for NanoString and their qc and sequencing runs
Samples for NanoString study and their QC and tumor percent							color legends and abbreations
RNA seq ID	Sample ID	DV200	RIN	Tumor type	Tumor %			DV200 of 30 -50%
Pt.9-fpT	2155-MD	54.51	1.7	Lung	79			DV200 >50%
Pt.11-fpT	2157-MD	58.32	2.5	Lung	45			DV200 <30%
Pt.9-fpT	2155-NMD	52.94	1.7	Lung	79		MD	Macro-dissected
Pt.11-fpT	2157-NMD	53.77	2.3	Lung	45		NMD	Not Macro-dissected
NA	2162-MD	38.16	1.6	Lung	37.9
NA	2164-MD	48.34	2.7	Lung	80
NA	2162-NMD	38.8	1.5	Lung	37.9
NA	2164-NMD	49.25	2.5	Lung	80
Pt.7-fpT	5899-NMD	23.52	2.5	Lung	46
Pt.8-fpT	4406-NMD	27.28	2.4	Lung	40.7
Pt.9-fpT	2155-NMD	24.19	2.4	Lung	79
Pt.11-fpT	2157-NMD	26.64	2.4	Lung	45
Pt.14-fpT	5213-NMD	24.09	2.5	Lung	almost 100

## Sheet: Sup.Table.S7
Sup.Table.S7. WES-seq and RNA-seq library, library quality control, and sequencing platforms used by each site
WES-seq library, library quality control, and sequencing platforms used by each site
	Library construction	Library QC	Sequencing
Center A	Illumina TruSeq Rapid Exome Kit with mods	CopyNumber, CrosscheckFingerprints, CalculateContamination, ConTest, MuTect, Mutect2, Strelka2, DeTiN	Illumina HiSeqX10
Center B	Agilent Sure Select Whole Exome Library Kit v5	Prehyb library size and quantity, Final library size and concentration	NovaSeq 6000
Center C	Agilent NGS/SureSelect V4	Platypus, MuTect 1.1.7, Pindel 0.2.5a8, ExomeCN	Illumina HiSeq 2500 SN 1222
			NovaSeq SN A00482
RNA-seq library, library quality control, and sequencing platforms used by each site
	RNA-seq library construction	Library QC	Sequencing
Center A	Illumina TruSeq (FF)	PicoGreen	NovaSeq (FF)
	Transcriptome capture (FFPE)		HiSeqX platform (FFPE)
Center B	Agilent SureSelectXT RNA direct protocol	Agilent TapeStation 4200	Illumina HiSeq 2500 SN 1222NovaSeq SN A00482
Center C	Illumina TruSeq RNA Exome kit	Agilent D1000 ScreenTape	NovaSeq
